# Supplementary material for: Effect of Protease Inhibitors in Healing of the Vaginal Wall
Source: PubMed Central journal article supplement (PMC6710245; doi:10.1038/s41598-019-48527-0), 2019-08-26

# EFFECT OF PROTEASE INHIBITORS IN HEALING OF THE VAGINAL WALL

Maria Florian-Rodriguez<sup>1</sup> \*MD, Kathleen Chin<sup>1</sup>, MD, Jennifer Hamner<sup>1</sup>, DO, Jesus Acevedo<sup>1</sup>, Patrick Keller<sup>1</sup>, and Ann Word<sup>1</sup> MD

<sup>1</sup>Cecil H and Ida Green Center for Reproductive Biological Sciences  
Department of Obstetrics and Gynecology  
Division of Female Pelvic Medicine and Reconstructive Surgery  
University of Texas Southwestern Medical Center, Dallas, Texas, USA



**Supplementary Figure 1. Flowchart of female Sprague-Dawley rat treatment groups.** Systemic estradiol injections were administered 1 and 3 days prior to injury, the day of injury or anesthesia alone (uninjured control group), and every other day following vaginal wall injury. Cut injury consisted of a single linear incision in the posterior vaginal wall. Wedge injury involved excision of a triangular piece of the posterior vagina. In ovariectomized rats, daily cream was applied for two weeks beginning on the day of oophorectomy, and continued or discontinued following vaginal cut injury based on treatment assignment. Tissues were collected at four time points following vaginal wall injury from 12 h to 7 d.

Fig. 1A

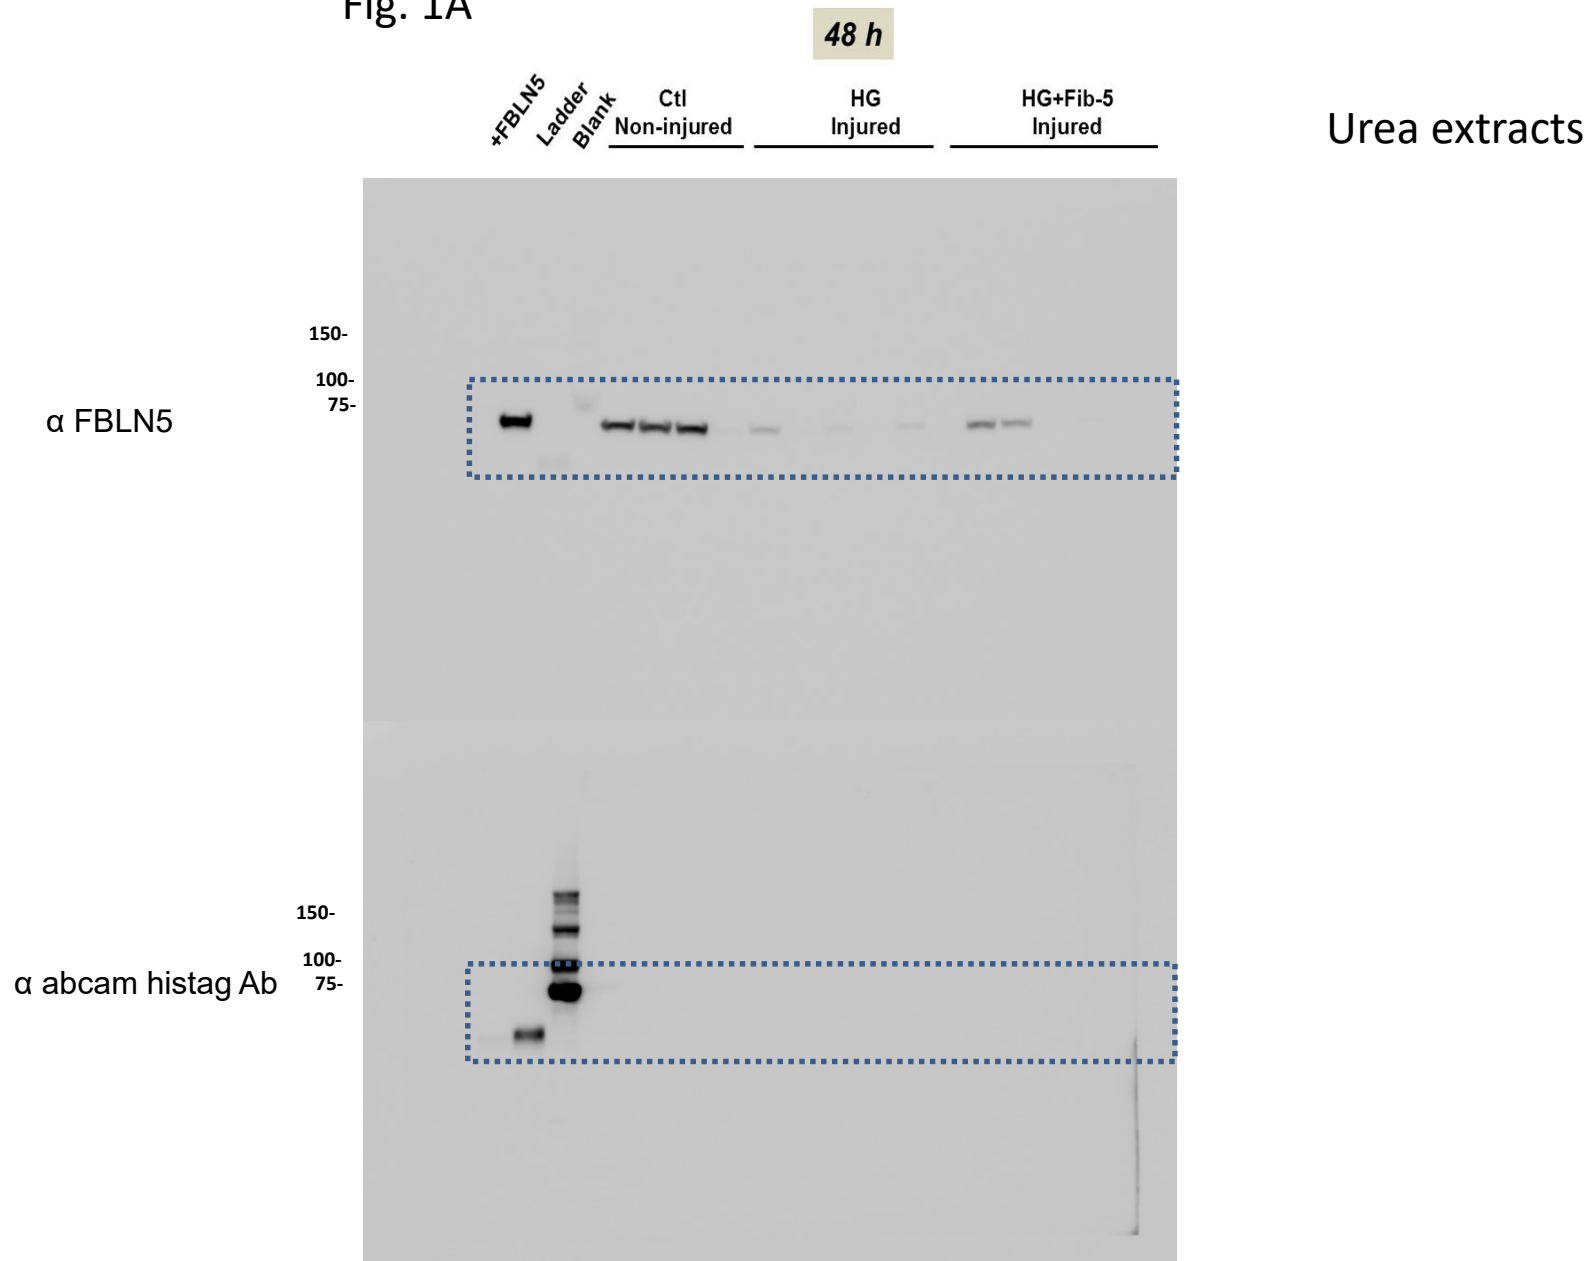

Fig. 1C. Blot A

1.23 1.46 1.21 1 0.29 0.95 0.51 0.51 0.77 0.34 0.42 0.49 0.06 0.49 0.53 0.11

48h ctl fib5ko CTL 12h 24h 48h

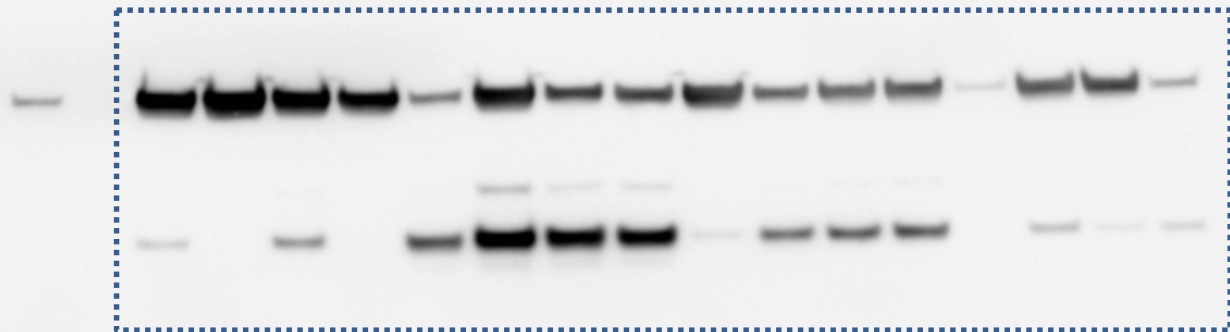

Fig. 1C Blot A

Amido Black

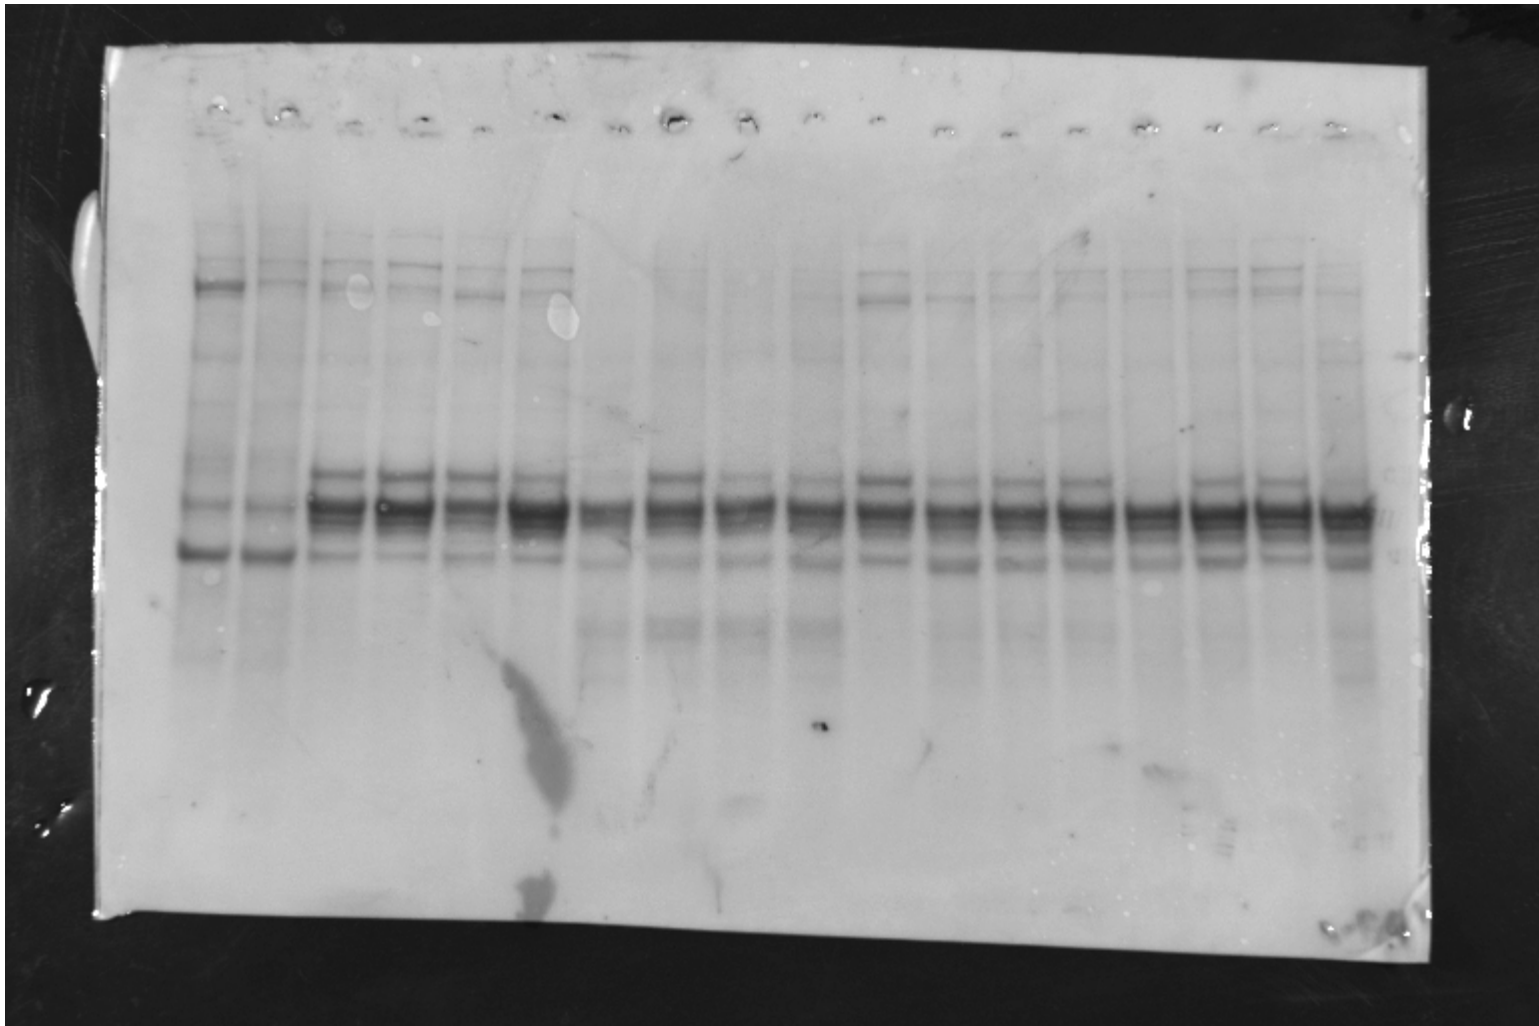



Amido Black

Fig. 1C blot B for 7d time point

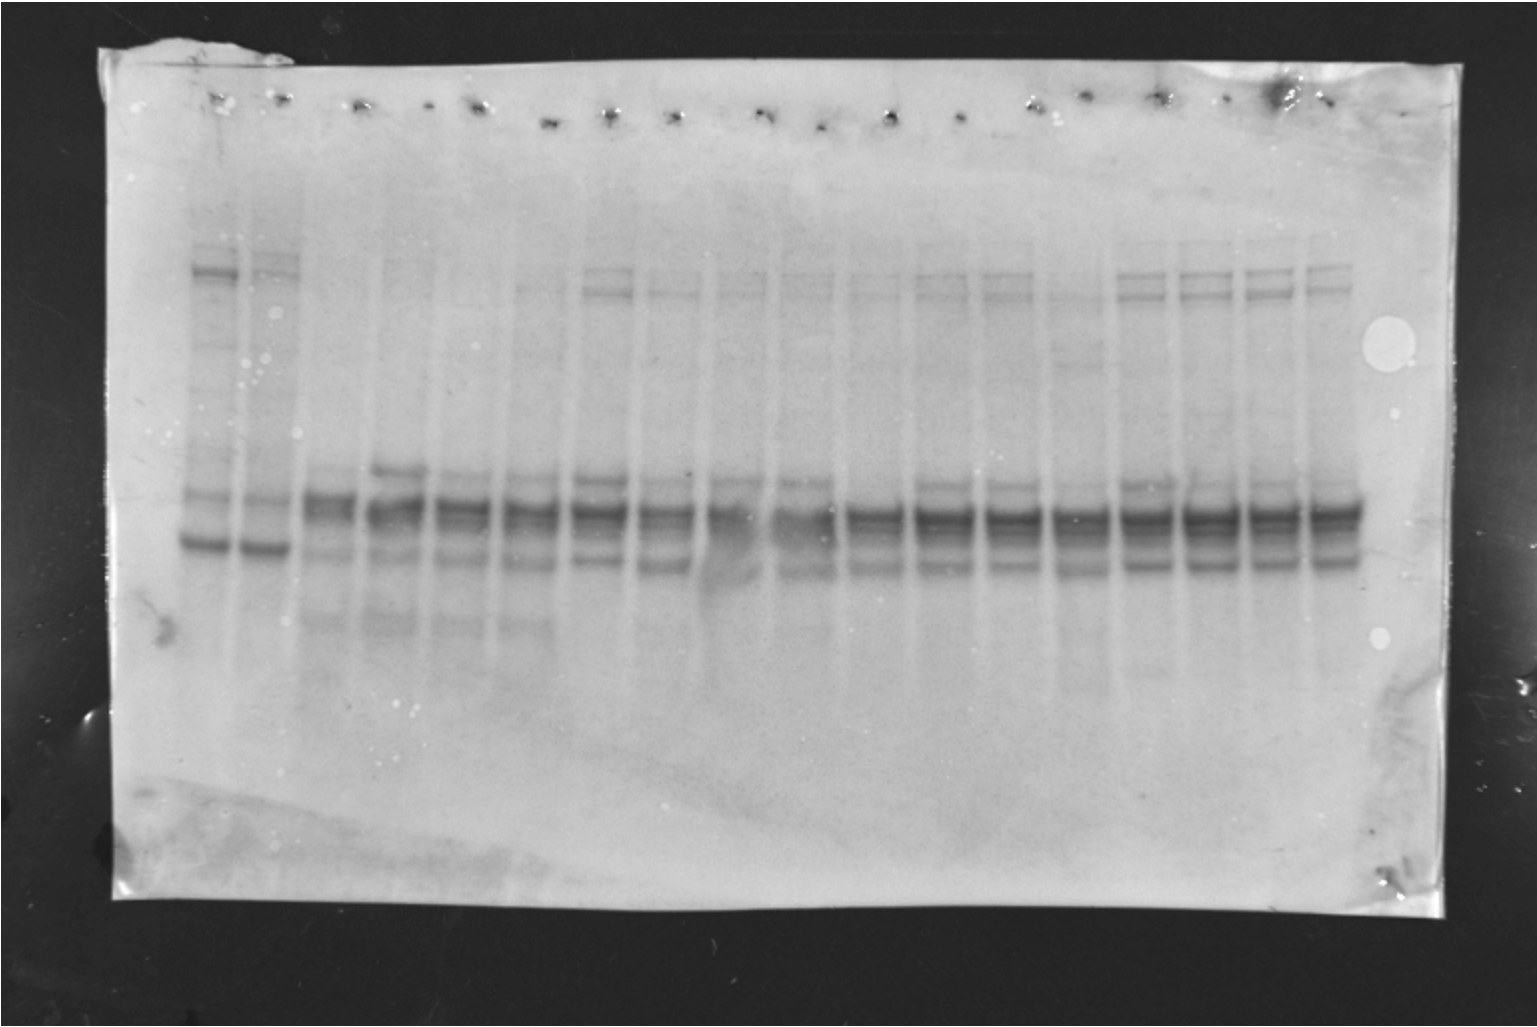



Fig. 2A

|         |        |                 |   |                |      |      |                     |      |      |                       |      |      |      |
|---------|--------|-----------------|---|----------------|------|------|---------------------|------|------|-----------------------|------|------|------|
| 0.13    | 1.13   | 0.33            | 1 | 1.02           | 0.89 | 1.32 | 0.88                | 1.38 | 0.91 | 0.98                  | 1.21 | 1.11 | 0.87 |
| 48h ctl | fib5ko | Systemic E2 inj |   | Ovx + E2 cream |      |      | Ovx + placebo cream |      |      | Ovx + extend E2 cream |      |      |      |
| <hr/>   |        |                 |   |                |      |      |                     |      |      |                       |      |      |      |

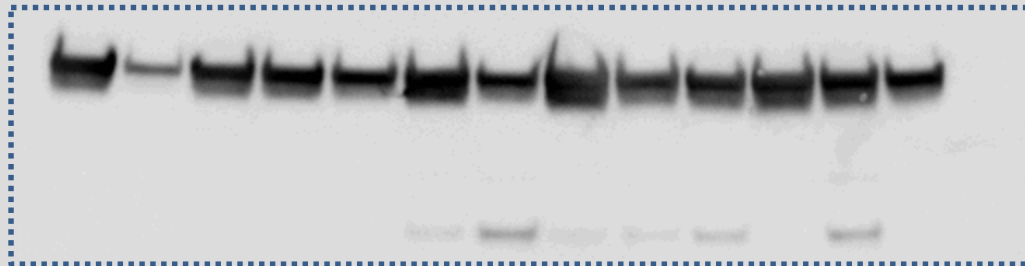

Fig. 2A  
Amido Black

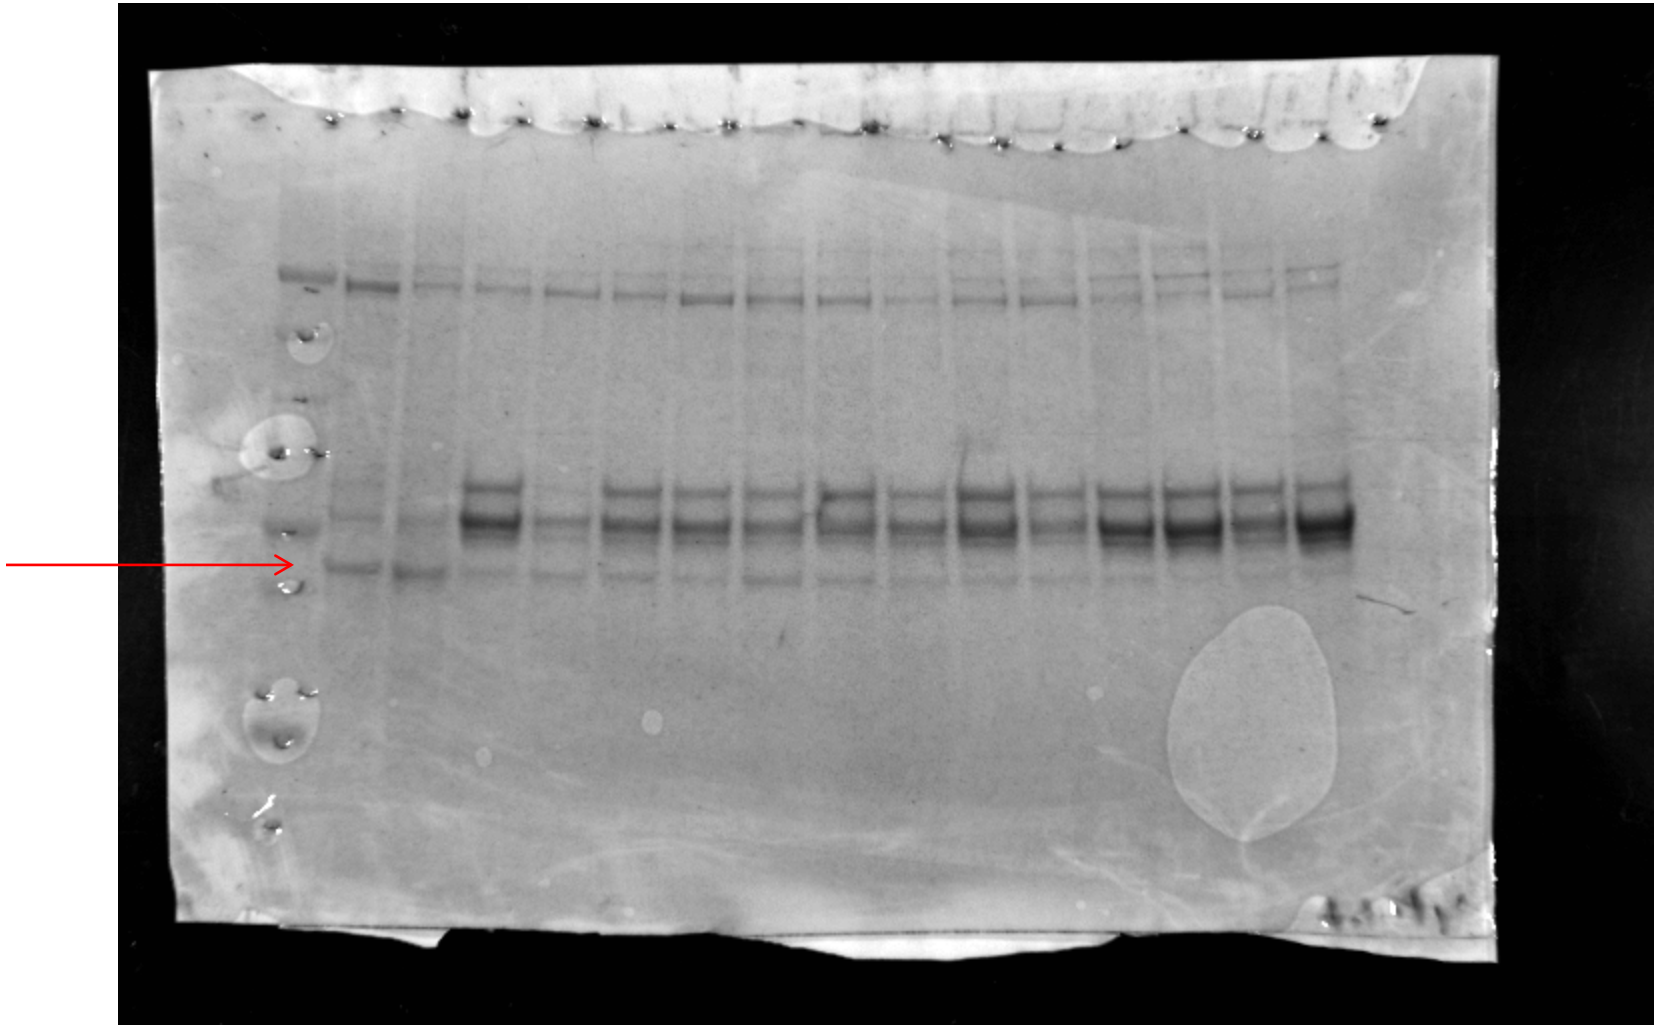

Fig. 3B

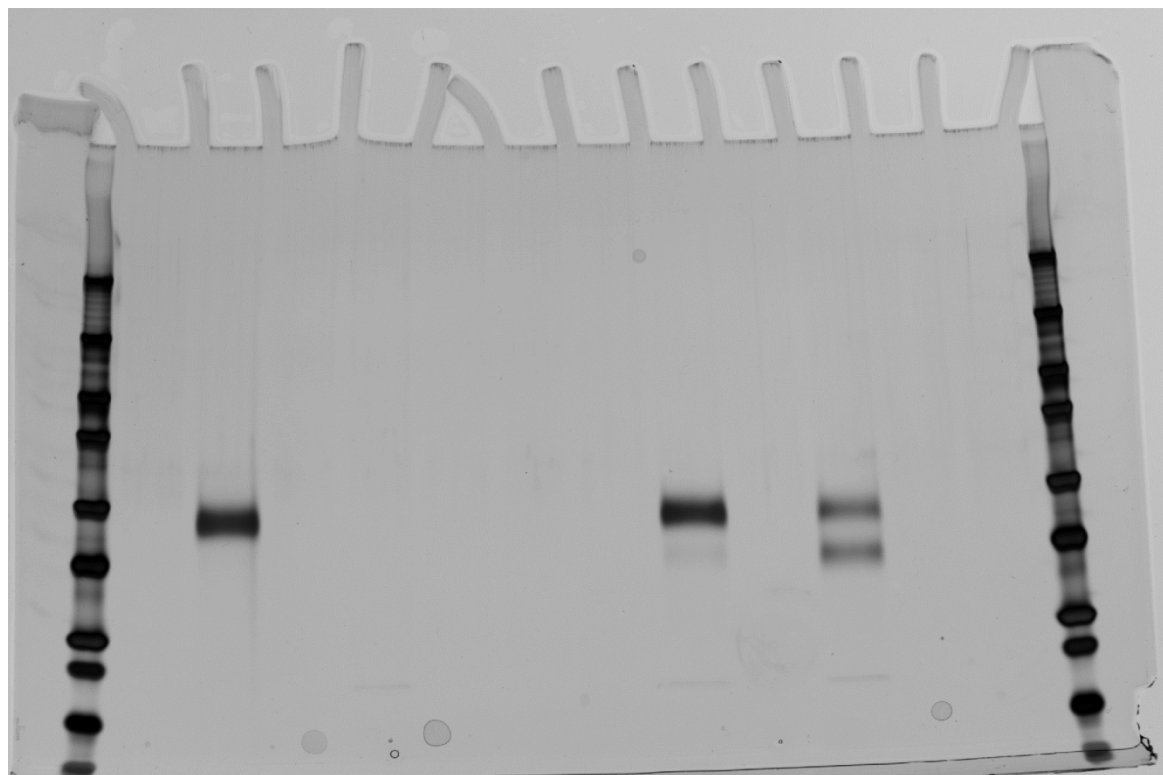

Fig. 4A

**Sham**  
—————  
24

**Inj + PBS**  
—————  
12 24 48 7d 14d

**Inj + Actinonin**  
—————  
12 24 48 7d 14d

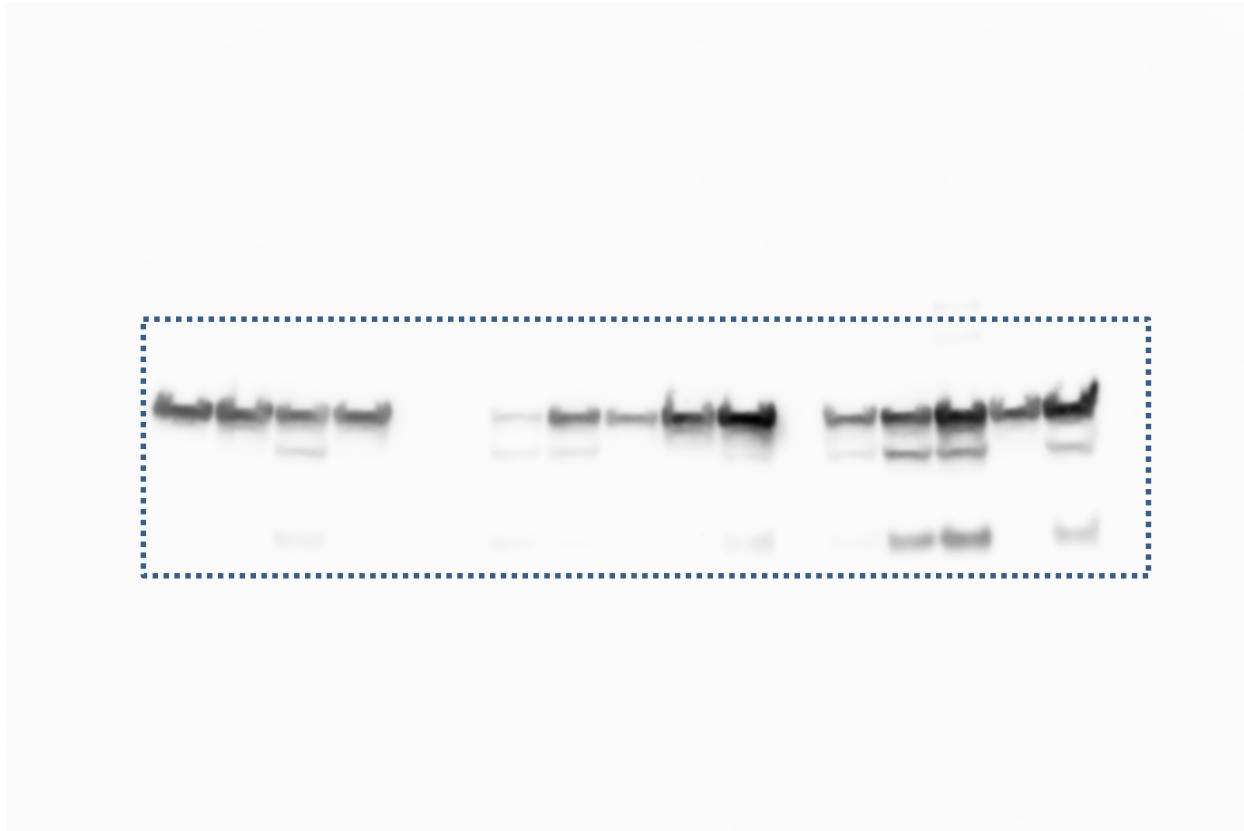

Fig. 4A  
Amido Black

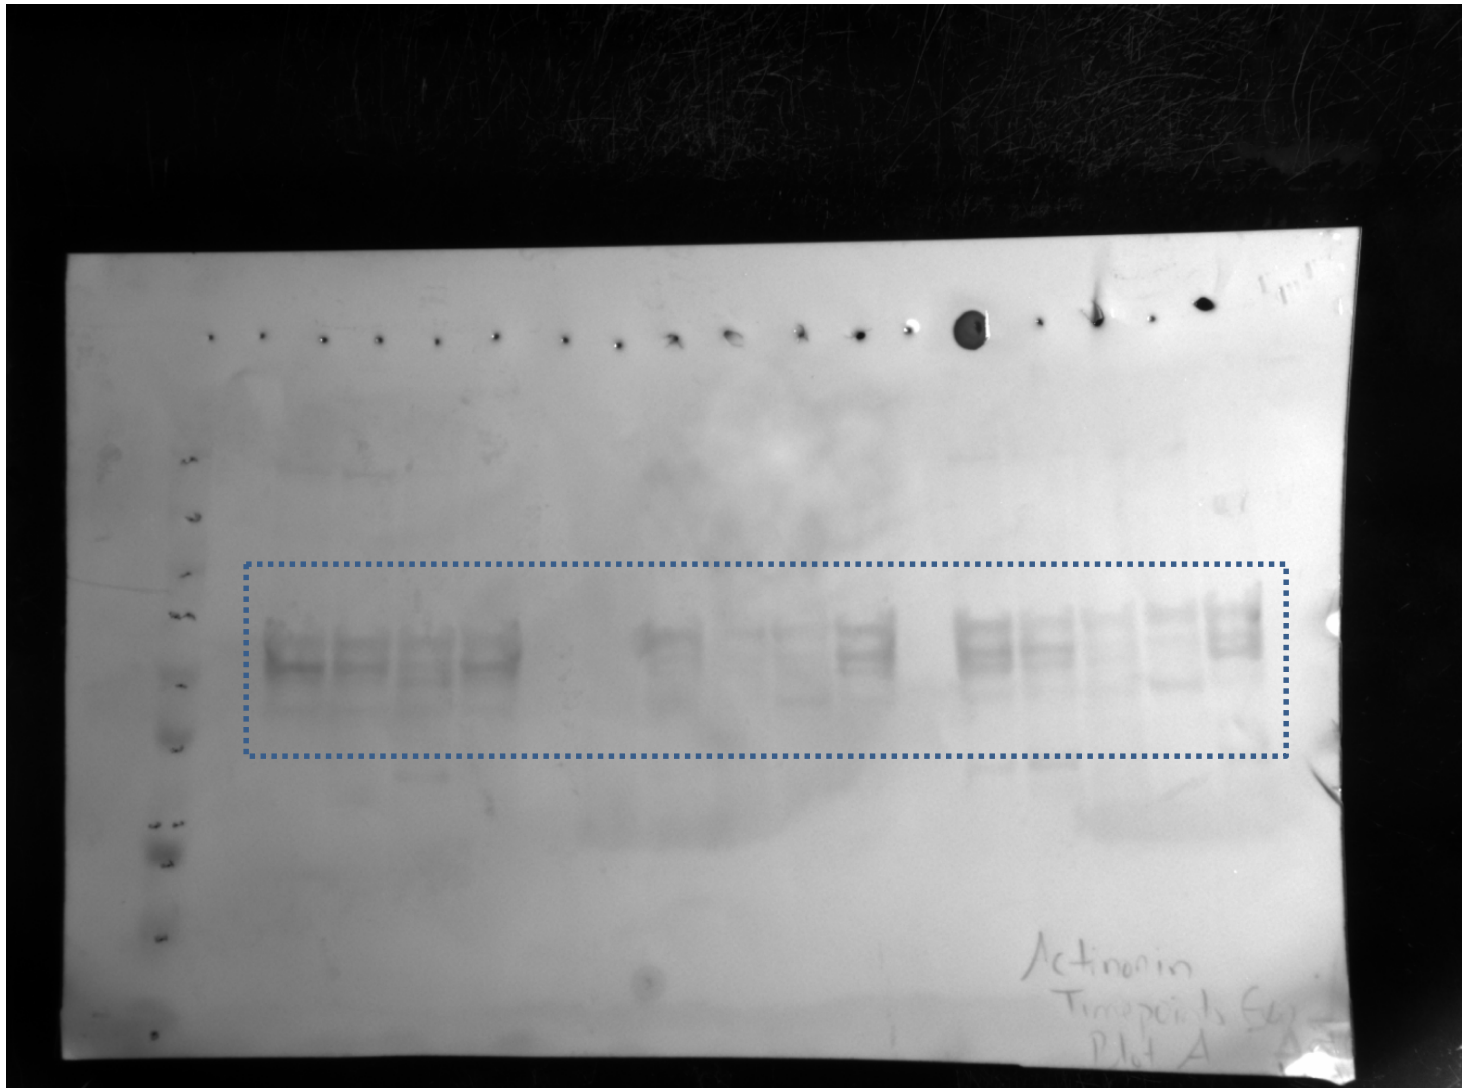

Supplement: 41598_2019_48527_MOESM1_ESM.pdf [file 41598_2019_48527_MOESM1_ESM.pdf]
